# Supplementary material for: Comprehensive genomic sequencing detects important genetic differences between right-sided and left-sided colorectal cancer
Source: PubMed Central journal article supplement (PMC5706819; doi:10.18632/oncotarget.20510), 2017-08-24
Supplement: oncotarget-08-93567-s001.pdf [file oncotarget-08-93567-s001.pdf]

## **Comprehensive genomic sequencing detects important genetic differences between right-sided and left-sided colorectal cancer**

### **SUPPLEMENTARY MATERIALS**

**Supplementary Table 1: Genetic alterations identified in 268 genes in 201 CRC patients.**

**See Supplementary File 1**

**Supplementary Table 2: Genetic alterations identified in 12 genes associated with resistance to anti-EGFR therapy in 201 CRC patients.**

**See Supplementary File 2**
